# Supplementary material for: Manual lymphatic drainage and quality of life in patients with lymphoedema and mixed oedema: a systematic review of randomised controlled trials
Source: Springer Nature journal article supplement (doi:10.1007/s11136-018-1796-5), 2018-02-05
Supplement: MOESM1 [file 15439262]

## Appendix S1. Search strategies

### MEDLINE search expression

| #  | Searches                                                                                                                         |         |
|----|----------------------------------------------------------------------------------------------------------------------------------|---------|
| 1  | exp Venous Insufficiency/ or venous insufficiency.mp.                                                                            | 7,970   |
| 2  | exp Edema/ or edema.mp. or oedema.mp.                                                                                            | 136,051 |
| 3  | exp Non-Filarial Lymphedema/ or exp Lymphedema/ or lymphedema.mp. or lymphoedema.mp. or lymphedemas.mp. or lymphoedemas.mp.      | 11,775  |
| 4  | (lymphedemic or lymphoedemic).mp.                                                                                                | 4       |
| 5  | lymphatic.ti,ab.                                                                                                                 | 37,681  |
| 6  | 1 or 2 or 3 or 4 or 5                                                                                                            | 186,281 |
| 7  | exp "Quality of Life"/ or quality of life.mp. or QoL.mp. or HRQoL.mp.                                                            | 215,063 |
| 8  | life quality.mp.                                                                                                                 | 4,055   |
| 9  | quality adjusted life.mp.                                                                                                        | 11,465  |
| 10 | well being.ti,ab.                                                                                                                | 43,143  |
| 11 | health status.mp. or Health Status/                                                                                              | 117,736 |
| 12 | mental health.ti,ab.                                                                                                             | 83,084  |
| 13 | daily living.ti,ab.                                                                                                              | 20,508  |
| 14 | general health.ti,ab.                                                                                                            | 18,564  |
| 15 | physical function.ti,ab.                                                                                                         | 7,310   |
| 16 | 7 or 8 or 9 or 10 or 11 or 12 or 13 or 14 or 15                                                                                  | 431,326 |
| 17 | conservative treatment.mp.                                                                                                       | 21,538  |
| 18 | cdp.mp.                                                                                                                          | 3,619   |
| 19 | cdt.mp.                                                                                                                          | 1,888   |
| 20 | decongestive.mp.                                                                                                                 | 293     |
| 21 | lymphatic drainage.mp.                                                                                                           | 2,372   |
| 22 | MLD.mp.                                                                                                                          | 1,910   |
| 23 | manual lymphatic.mp.                                                                                                             | 156     |
| 24 | lymphatic therapy.mp.                                                                                                            | 108     |
| 25 | exp drainage/ and exp lymphedema/                                                                                                | 318     |
| 26 | compression therapy.mp.                                                                                                          | 947     |
| 27 | pneumatic compression*.mp.                                                                                                       | 1,187   |
| 28 | compression garment.mp.                                                                                                          | 72      |
| 29 | compression bandage*.mp.                                                                                                         | 959     |
| 30 | compression hosiery.mp.                                                                                                          | 123     |
| 31 | compression therap*.mp.                                                                                                          | 955     |
| 32 | exp Compression Bandages/                                                                                                        | 1,715   |
| 33 | ((foldi or vodder) and method).mp.                                                                                               | 8       |
| 34 | exp Massage/ or Massage.mp.                                                                                                      | 11,454  |
| 35 | physical therap*.mp.                                                                                                             | 41,317  |
| 36 | management.mp. and exp lymphedema/                                                                                               | 767     |
| 37 | treatment.mp. and exp lymphedema/                                                                                                | 3,162   |
| 38 | exp Musculoskeletal Manipulations/                                                                                               | 14,047  |
| 39 | 17 or 18 or 19 or 20 or 21 or 22 or 23 or 24 or 25 or 26 or 27 or 28 or 29 or 30 or 31 or 32 or 33 or 34 or 35 or 36 or 37 or 38 | 96,376  |
| 40 | 6 and 16 and 39                                                                                                                  | 556     |

Database searched on 27.06.2016.

## EMBASE search expression

| #  | Searches                                                                                                                                                                      |         |
|----|-------------------------------------------------------------------------------------------------------------------------------------------------------------------------------|---------|
| 1  | exp vein insufficiency/ or venous insufficiency.mp. or vein insufficiency.mp.                                                                                                 | 11,343  |
| 2  | exp edema/ or (edema or oedema).ti,ab.                                                                                                                                        | 304,050 |
| 3  | exp lymphedema/ or (lymphedema* or lymphoedema*).ti,ab.                                                                                                                       | 19,182  |
| 4  | exp lymph vessel/                                                                                                                                                             | 29,235  |
| 5  | lymphatic.ti,ab.                                                                                                                                                              | 63,055  |
| 6  | (lymphedemic or lymphoedemic).ti,ab.                                                                                                                                          | 7       |
| 7  | 1 or 2 or 3 or 4 or 5 or 6                                                                                                                                                    | 395,725 |
| 8  | exp "quality of life"/ or quality of life.ti,ab. Or QoL.mp. or HRQOL.mp.                                                                                                      | 400,876 |
| 9  | life quality.ti,ab.                                                                                                                                                           | 8,467   |
| 10 | quality adjusted life.ti,ab.                                                                                                                                                  | 12,043  |
| 11 | quality adjusted year*.ti,ab.                                                                                                                                                 | 83      |
| 12 | exp wellbeing/ or ("well-being" or "well being" or "wellbeing").ti,ab.                                                                                                        | 87,480  |
| 13 | exp health status/                                                                                                                                                            | 176,797 |
| 14 | exp mental health/                                                                                                                                                            | 108,864 |
| 15 | 8 or 9 or 10 or 11 or 12 or 13 or 14                                                                                                                                          | 686,762 |
| 16 | conservative treatment.ti,ab. Or conservative treatment/                                                                                                                      | 81,538  |
| 17 | cdp.mp.                                                                                                                                                                       | 5,095   |
| 18 | cdt.mp.                                                                                                                                                                       | 3,172   |
| 19 | (decongestive and (lymphatic or therapy or physiotherapy)).ti,ab.                                                                                                             | 504     |
| 20 | exp lymphatic drainage/                                                                                                                                                       | 5,679   |
| 21 | (lymphatic and (drainage* or therap* or manual)).ti,ab.                                                                                                                       | 14,983  |
| 22 | MLD.mp.                                                                                                                                                                       | 3,583   |
| 23 | exp compression therapy/                                                                                                                                                      | 7,324   |
| 24 | (compression* and (garment or hosiery or bandage* or therap*)).ti,ab.                                                                                                         | 17,058  |
| 25 | ((foldi or vodder) and method).mp.                                                                                                                                            | 25      |
| 26 | exp massage/ or massage*.ti,ab.                                                                                                                                               | 19,326  |
| 27 | treatment*.mp. and exp lymphedema/                                                                                                                                            | 7,221   |
| 28 | therap*.mp. and exp lymphedema/                                                                                                                                               | 5,714   |
| 29 | physiotherapy.mp. and exp lymphedema/ [mp=title, abstract, heading word, drug trade name, original title, device manufacturer, drug manufacturer, device trade name, keyword] | 900     |
| 30 | 16 or 17 or 18 or 19 or 20 or 21 or 22 or 23 or 24 or 25 or 26 or 27 or 28 or 29                                                                                              | 156,390 |
| 31 | 7 and 15 and 30                                                                                                                                                               | 1,813   |

Database searched on 27.06.2016.

## PsycINFO search expression

| #  | Searches                                                              |           |
|----|-----------------------------------------------------------------------|-----------|
| 1  | venous insufficiency.mp.                                              | 122       |
| 2  | exp EDEMA/ or edema.mp. or oedema.mp.                                 | 2,734     |
| 3  | (lymphoedema or lymphedema).mp.                                       | 158       |
| 4  | lymphatic.mp.                                                         | 1,238     |
| 5  | 1 or 2 or 3 or 4                                                      | 4,177     |
| 6  | exp "Quality of Life"/ or quality of life.mp. or QoL.mp. or HRQOL.mp. | 58,281    |
| 7  | life quality.mp.                                                      | 1,373     |
| 8  | quality adjusted life.mp.                                             | 976       |
| 9  | exp Mental Health/ or exp Physical Health/ or health status.mp.       | 66,399    |
| 10 | well-being.mp. or exp Well Being/                                     | 65,009    |
| 11 | daily living.mp.                                                      | 15,520    |
| 12 | physical function.mp.                                                 | 1,800     |
| 13 | general health.mp.                                                    | 12,699    |
| 14 | 6 or 7 or 8 or 9 or 10 or 11 or 12 or 13                              | 191,565   |
| 15 | cdp.mp.                                                               | 605       |
| 16 | cdt.mp.                                                               | 503       |
| 17 | decongestive.mp.                                                      | 11        |
| 18 | (lymphatic therapy or manual lymphatic or MLD).mp.                    | 319       |
| 19 | exp Physical Therapy/ or physical therap*.mp.                         | 4,230     |
| 20 | drainage.mp.                                                          | 525       |
| 21 | compression.mp.                                                       | 2,923     |
| 22 | exp MASSAGE/ or massage.mp.                                           | 1,274     |
| 23 | exp TREATMENT/ or treatment.mp.                                       | 896,259   |
| 24 | exp MANAGEMENT/ or management.mp.                                     | 215,794   |
| 25 | 15 or 16 or 17 or 18 or 19 or 20 or 21 or 22 or 23 or 24              | 1,040,204 |
| 26 | 5 and 14 and 25                                                       | 188       |

Database searched on 27.06.2016.

## Cochrane Central Register of Controlled Trials search expression

| #  | Searches                                                                                                                                            |         |
|----|-----------------------------------------------------------------------------------------------------------------------------------------------------|---------|
| 1  | MeSH descriptor: [Lymphedema] explode all trees                                                                                                     | 349     |
| 2  | lymphoedema or "lymphoedemas" or "lymphedemas" or "Lymphoedemas" or "oedema" or "edema" or "oedemas" or "edemas" or "lymphedemic" or "lymphoedemic" | 11,327  |
| 3  | MeSH descriptor: [Edema] explode all trees                                                                                                          | 1,212   |
| 4  | MeSH descriptor: [Venous Insufficiency] explode all trees                                                                                           | 439     |
| 5  | venous insufficiency                                                                                                                                | 810     |
| 6  | 1 or 2 or 3 or 4 or 5                                                                                                                               | 12,212  |
| 7  | quality of life                                                                                                                                     | 49,944  |
| 8  | MeSH descriptor: [Quality of Life] explode all trees                                                                                                | 17,782  |
| 9  | life quality                                                                                                                                        | 2,171   |
| 10 | quality adjusted life                                                                                                                               | 6,966   |
| 11 | health status or "well being" or "mental health" or "daily living" or "physical function" or "general health"                                       | 35,248  |
| 12 | qol or "HRQoL"                                                                                                                                      | 9,266   |
| 13 | MeSH descriptor: [Health Status] explode all trees                                                                                                  | 6,169   |
| 14 | 7 or 8 or 9 or 10 or 11 or 12 or 13                                                                                                                 | 79,585  |
| 15 | drainage                                                                                                                                            | 5,614   |
| 16 | cdp                                                                                                                                                 | 250     |
| 17 | cdt                                                                                                                                                 | 159     |
| 18 | decongestive                                                                                                                                        | 145     |
| 19 | drain*                                                                                                                                              | 6,794   |
| 20 | mld or "manual lymphatic" or "manual therapy" or "manual therapies"                                                                                 | 1,133   |
| 21 | lymph* therap*                                                                                                                                      | 20,027  |
| 22 | compression                                                                                                                                         | 5,557   |
| 23 | ("foldi" or "vodder") and "method"                                                                                                                  | 8       |
| 24 | MeSH descriptor: [Massage] explode all trees                                                                                                        | 884     |
| 25 | massage                                                                                                                                             | 2,790   |
| 26 | treatment or "treatments" or "management" or "physical" or "intervention"                                                                           | 537,484 |
| 27 | MeSH descriptor: [Physical Therapy Modalities] explode all trees                                                                                    | 18,743  |
| 28 | 15 or 16 or 17 or 18 or 19 or 20 or 21 or 22 or 23 or 24 or 25 or 26 or 27                                                                          | 550,505 |
| 29 | 6 and 14 and 28 (Trials)                                                                                                                            | 734     |

Database searched on 27.06.2016.

## Cochrane database of systematic reviews search expression

| # | Searches                            |        |
|---|-------------------------------------|--------|
| 1 | manual lymphatic drainage           | 99     |
| 2 | complete decongestive therapy       | 15     |
| 3 | complete decongestive physiotherapy | 7      |
| 4 | complex decongestive therapy        | 21     |
| 5 | decongestive lymphatic therapy      | 23     |
| 6 | 1 or 2 or 3 or 4 or 5               | 128    |
| 7 | quality of life                     | 57,544 |
| 8 | 6 and 7 (Filter Reviews)            | 19     |

Database searched on 27.06.2016.

## ClinicalTrials.gov search expression

| # | Searches                                                                                                                                                                                                                                                                                                                                                                                                                                                                                                                |        |
|---|-------------------------------------------------------------------------------------------------------------------------------------------------------------------------------------------------------------------------------------------------------------------------------------------------------------------------------------------------------------------------------------------------------------------------------------------------------------------------------------------------------------------------|--------|
| 1 | Outcome: Quality of life OR QOL OR HRQOL OR Well Being OR life quality OR quality adjusted life OR daily living OR physical function OR general health                                                                                                                                                                                                                                                                                                                                                                  | 28,311 |
| 2 | venous insufficiency OR edema OR oedema OR lymphedema OR lymphoedema OR lymphedemas OR lymphoedemas lymphedemic OR lymphoedemic OR lymphatic                                                                                                                                                                                                                                                                                                                                                                            | 6,634  |
| 3 | INFLECT EXACT NOT ( "Recruiting" OR "Not yet recruiting" OR "Available" ) [OVERALL-STATUS] AND NOT NOTEXT [FIRST-RECEIVED-RESULTS-DATE] AND INFLECT EXACT "Interventional" [STUDY-TYPES] AND ( venous insufficiency OR edema OR oedema OR lymphedema OR lymphoedema OR lymphedemas OR lymphoedemas lymphedemic OR lymphoedemic OR lymphatic ) [DISEASE] AND ( Quality of life OR QOL OR HRQOL OR Well Being OR life quality OR quality adjusted life OR daily living OR physical function OR general health ) [OUTCOME] | 146    |

Database searched on 27.06.2016.
