# Supplementary material for: Manual lymphatic drainage and quality of life in patients with lymphoedema and mixed oedema: a systematic review of randomised controlled trials
Source: Springer Nature journal article supplement (doi:10.1007/s11136-018-1796-5), 2018-02-05
Supplement: MOESM2 [file 15439262]

**Appendix S2.** Overall HRQoL reported for each arm of the RCTs at baseline and post-intervention, and statistical significance of the effect of the interventions within each group and between groups. The scores are given as mean (SD) or median (range).

| First author<br>(year of<br>publication) | Aetiology,<br>area with<br>oedema | HRQoL measurement |                     |                    |                                                     | Intervention group (IG)  |                          |                      | Control group (CG)       |                          |                      | IG vs. CG               |
|------------------------------------------|-----------------------------------|-------------------|---------------------|--------------------|-----------------------------------------------------|--------------------------|--------------------------|----------------------|--------------------------|--------------------------|----------------------|-------------------------|
|                                          |                                   | Scale             | Disease<br>specific | Oedema<br>specific | Interpretation                                      | Baseline                 | Follow-up                | p-value <sup>1</sup> | Baseline                 | Follow-Up                | p-value <sup>1</sup> | p-value <sup>2</sup>    |
| Belmonte<br>(2012) [26]                  | BCRL, arm                         | FACT-G            | No                  | No                 | Higher score indicates better status (Range: 0-100) | 69.7 (11.9) <sup>3</sup> | 69.9 (14.1) <sup>3</sup> | n.r.                 | 74.3 (13.5) <sup>3</sup> | 77.2 (14.0) <sup>3</sup> | n.r.                 | <b>0.13<sup>4</sup></b> |
|                                          |                                   | FACT-B            | Yes                 | No                 | Higher score indicates better status (Range 0-144)  | 91.4 (18.4) <sup>3</sup> | 88.9 (17.0) <sup>3</sup> | n.r.                 | 96.7 (16.7) <sup>3</sup> | 99.6 (19.0) <sup>3</sup> | n.r.                 | <b>0.08<sup>4</sup></b> |
|                                          |                                   | FACT-TOI          | Yes                 | No                 | Higher score indicates better status (Range 0-84)   | 60.3 (12.3) <sup>3</sup> | 55.9 (12.4) <sup>3</sup> | n.r.                 | 59.9 (13.0) <sup>3</sup> | 61.9 (13.6) <sup>3</sup> | n.r.                 | <b>0.17<sup>4</sup></b> |
| Gradalski<br>(2015) [29]                 | BCRL, arm                         | QoL-LQ            | No                  | Yes                | Lower score indicates better status (Range: 0-10)   | 3.1 (1.5)                | 1.4 (1.1)                | <b>&lt;0.001</b>     | 3.2 (1.7)                | 1.8 (1.1)                | <b>&lt;0.001</b>     | <b>0.4</b>              |
| Odebiyi<br>(2014) [31]                   | BCRL, arm                         | EORTC QLQ-C30     | No                  | No                 | Lower score indicates better status (Range: 0-126)  | 84.2 (22.0)              | 49.4 (9.9)               | <b>&lt;0.001</b>     | 91.1 (13.7)              | 79.5 (12.3)              | <b>0.06</b>          | <b>&lt;0.001</b>        |
|                                          |                                   | ULL-27            | No                  | Yes                | Higher score indicates better status (Range: 0-100) | 69 (52-88)               | 79 (62-91)               | n.r.                 | 80 (65-91)               | 90 (54-98)               | n.r.                 | <b>0.59<sup>5</sup></b> |
| Ridner<br>(2013) [32]                    | BCRL, arm                         | FACT-G            | No                  | No                 | Higher score indicates better status (Range: 0-100) | 91 (32-107)              | 86 (60-105)              | n.r.                 | 88 (32-107)              | 92 (50-105)              | n.r.                 | <b>0.32<sup>5</sup></b> |
|                                          |                                   | FACT-B            | Yes                 | No                 | Higher score indicates better status (Range 0-144)  | 116 (64-133)             | 110 (91-136)             | n.r.                 | 111 (40-134)             | 114 (62-134)             | n.r.                 | <b>0.25<sup>5</sup></b> |
| Bongi<br>(2011) [27]                     | SSc, hand                         | HAQ-DI            | No                  | No                 | Lower score indicates better status (Range: 0-3)    | 1.6 (0.8)                | 0.9 (0.7)                | <b>&lt;0.001</b>     | 1.5 (0.9)                | 1.5 (0.9)                | <b>&gt;0.05</b>      | <b>0.05</b>             |
| Holmes<br>(2014) [30]                    | PTS, leg                          | VEINES-QOL        | Yes                 | No                 | Higher score indicates better status                | 51 (7)                   | 50 (6)                   | <b>0.17</b>          | 49 (6)                   | 50 (7)                   | <b>0.84</b>          | <b>0.43</b>             |
| dos Santos Crisostomo<br>(2015) [33]     | CVI, leg                          | CIVIQ-20          | Yes                 | No                 | Lower score indicates better status (Range: 0-100)  | 48.1 (12.5)              | 44.8 (14.9)              | n.r.                 | 48.7 (16.0)              | 50.2 (17.6)              | n.r.                 | <b>&gt;0.05</b>         |

## Notes

Results for Dayes et al, 2013 were presented by domain only and therefore not presented here.

<sup>1</sup>p-value for the comparison of the mean scores obtained pre- and post-intervention within each arm of the trial. All studies used a significance level of p=0.05.

<sup>2</sup>p-value for the comparison of the mean scores between the IG and CG. All studies used a significance level of p=0.05.

<sup>3</sup>cross-over trial: data extracted only for the first cycle to avoid carry over and period effects.

<sup>4</sup>p-value calculated using the information given in the original study using an independent sample t-test.

<sup>5</sup>p-value of the mixed general linear modeling analysis. The two factors included in this analysis were group (LLLT, MLD, and MLD and LLLT) and time of assessment (baseline, last treatment).

### **Abbreviations**

CIVIQ-20, Chronic Venous Insufficiency Quality of Life Questionnaire-20;

CG, control group;

EORTC QLQ-C30, European Organization for Research and Treatment of Cancer Quality of Life Questionnaire core 30;

FACT-B, FACT-G, FACT-TOI, Functional Assessment of Cancer Therapy(-breast)(-general)(-trial outcome index);

HAQ-DI, Health Assessment Questionnaire for Rheumatoid Arthritis;

HRQoL, Health-related Quality of Life;

IG, intervention group;

LLLT, Low-level laser therapy;

MLD, manual lymphatic drainage;

n.r., not reported;

QoL-LQ, Quality-of-life Lymphoedema Questionnaire;

ULL-27, Upper Limb Lymphoedema-27;

VEINES-QOL, Venous Insufficiency Epidemiological and Economic Study Quality of Life questionnaire.
