# Supplementary material for: Manual lymphatic drainage and quality of life in patients with lymphoedema and mixed oedema: a systematic review of randomised controlled trials
Source: Springer Nature journal article supplement (doi:10.1007/s11136-018-1796-5), 2018-02-05
Supplement: MOESM3 [file 15442176]

**Appendix S3.** HRQoL domains reported for each arm of the RCTs at baseline and post-intervention, and statistical significance of the effect of the interventions within each group and between groups. The scores are given as mean (SD) or median (range).

| HRQoL domain                      | Intervention group (IG)     |                                                      |                               |                |                 |                      | Control group (CG) |                 |                      | IG vs. CG          |
|-----------------------------------|-----------------------------|------------------------------------------------------|-------------------------------|----------------|-----------------|----------------------|--------------------|-----------------|----------------------|--------------------|
|                                   | Aetiology, area with oedema | Scale                                                | Condition specific instrument | Baseline score | Follow-up score | p-value <sup>1</sup> | Baseline score     | Follow-up score | p-value <sup>1</sup> |                    |
| <b>Physical functioning</b>       |                             |                                                      |                               |                |                 |                      |                    |                 |                      |                    |
| Belmonte (2012) [26]              | BCRL, arm                   | FACT-B Physical well-being subscale <sup>3</sup>     |                               | 22.7 (3.6)     | 22.0 (4.5)      | n.r.                 | 21.5 (6.2)         | 22.6 (6.2)      | n.r.                 | 0.245 <sup>7</sup> |
|                                   |                             | VAS tightness <sup>3</sup>                           |                               | 33.8 (27.7)    | 33.0 (28.0)     | n.r.                 | 20.9 (27.2)        | 13.3 (24.6)     | n.r.                 | 0.049 <sup>7</sup> |
|                                   |                             | VAS heaviness <sup>3</sup>                           |                               | 37.5 (34.1)    | 34.7 (34.4)     | n.r.                 | 37.2 (34.5)        | 22.4 (27.4)     | n.r.                 | 0.673 <sup>7</sup> |
| Dayes (2013) [28]                 | BCRL, arm                   | SF-36 PSI                                            |                               | 42.7 (6.7)     | 43.9 (7.8)      | >0.1                 | 42.6 (7.4)         | 43.8 (7.1)      | >0.1                 | >0.1               |
|                                   |                             | DASH                                                 |                               | 32.2 (21.8)    | 32.3 (21.5)     | >0.1                 | 32.2 (23.8)        | 29.7 (22.4)     | >0.1                 | >0.1               |
| Gradalski (2015) [29]             | BCRL, arm                   | Limb heaviness <sup>4</sup>                          | X                             | 4.0 (2.6)      | 1.6 (2.3)       | 0.0017               | 4.0 (3.3)          | 1.9 (1.8)       | 0.008                | 0.7                |
|                                   |                             | Movement Restriction <sup>4</sup>                    | X                             | 3.1 (3.0)      | 1.6 (2.4)       | 0.06                 | 3.1 (3.8)          | 1.7 (2.1)       | 0.1                  | 0.7                |
| Bongi (2011) [27]                 | SSc, hand                   | SF-36 PSI                                            |                               | 38.8 (7.9)     | 44.8 (8.3)      | <0.001               | 39.2 (7.0)         | 39.0 (7.4)      | >0.05                | <0.05              |
| Holmes (2014) [30]                | PTS, leg                    | Leg heaviness <sup>6</sup>                           | X                             | 2.3 (1.0)      | 2.0 (1.0)       | 0.14                 | 2.4 (1.0)          | 1.9 (1.0)       | 0.05                 | 0.783 <sup>7</sup> |
| dos Santos Crisostomo (2015) [33] | CVI, leg                    | CIVIQ-20 physical                                    |                               | 54.0 (16.3)    | 48.7 (19.9)     | n.r.                 | 50.2 (21.2)        | 50.7 (21.2)     | n.r.                 | >0.05              |
|                                   |                             | Heaviness (VAS)                                      |                               | 5.3 (2.4)      | 2.1 (2.2)       | 0.001                | 4.7 (2.9)          | 4.3 (2.9)       | >0.05                | 0.001              |
| <b>Role functioning</b>           |                             |                                                      |                               |                |                 |                      |                    |                 |                      |                    |
| Belmonte (2012) [26]              | BCRL, arm                   | FACT-B Functional well-being subscale <sup>3</sup>   |                               | 16.3 (3.7)     | 15.2 (6.7)      | n.r.                 | 15.3 (5.7)         | 15.8 (5.0)      | n.r.                 | 0.109 <sup>7</sup> |
|                                   |                             | Interference with work <sup>4</sup>                  | X                             | 0.9 (2.0)      | 0.4 (1.1)       | 0.3                  | 0.6 (2.1)          | 0.5 (1.7)       | 0.9                  | 0.3                |
| Gradalski (2015) [29]             | BCRL, arm                   | Issues with clothing <sup>4</sup>                    | X                             | 5.3 (3.0)      | 2.2 (2.2)       | <0.001               | 5.9 (3.0)          | 3.1 (2.8)       | 0.001                | 0.7                |
|                                   |                             | Interference with household <sup>5</sup>             | X                             | 4.3 (3.1)      | 3.3 (2.3)       | 0.2                  | 5.1 (3.1)          | 3.9 (2.6)       | 0.2                  | 0.9                |
|                                   |                             | Dependence others                                    | X                             | 2.3 (2.7)      | 2.2 (2.7)       | 0.9                  | 3.4 (3.4)          | 2.5 (2.7)       | 0.3                  | 0.6                |
| Bongi (2011) [27]                 | SSc, hand                   | Inference life (VAS)                                 | X                             | 4.3 (2.5)      | 2.0 (1.8)       | <0.001               | 4.5 (2.5)          | 4.1 (2.3)       | >0.05                | <0.01              |
| <b>Psychological functioning</b>  |                             |                                                      |                               |                |                 |                      |                    |                 |                      |                    |
| Belmonte (2012) [26]              | BCRL, arm                   | FACT-B Emotional well-being subscale <sup>3</sup>    |                               | 13.9 (5.6)     | 14.8 (5.5)      | n.r.                 | 18.1 (4.4)         | 18.4 (4.0)      | n.r.                 | 0.140 <sup>7</sup> |
| Dayes (2013) [28]                 | BCRL, arm                   | SF-36 MSI                                            |                               | 42.4 (6.3)     | 44.3 (7.0)      | >0.1                 | 44.2 (5.6)         | 44.3 (5.8)      | >0.1                 | >0.1               |
|                                   |                             | Sleep disturbance <sup>4</sup>                       | X                             | 3.4 (2.9)      | 1.1 (2.2)       | 0.004                | 2.9 (3.1)          | 1.4 (2.4)       | 0.06                 | 0.2                |
| Gradalski (2015) [29]             | BCRL, arm                   | Inference well being <sup>4</sup>                    | X                             | 3.7 (2.9)      | 1.4 (1.9)       | 0.002                | 3.9 (3.0)          | 2.2 (2.2)       | 0.03                 | 0.4                |
|                                   |                             | Subjective worsening of limb appearance <sup>4</sup> |                               | 4.8 (2.8)      | 1.2 (1.8)       | <0.001               | 5.3 (2.8)          | 2.0 (2.4)       | <0.001               | 0.6                |

| HRQoL domain                                 | Aetiology, area with oedema | Scale                                          | Condition specific instrument | Intervention group (IG) |                 |                      | Control group (CG) |                 |                      | IG vs. CG            |
|----------------------------------------------|-----------------------------|------------------------------------------------|-------------------------------|-------------------------|-----------------|----------------------|--------------------|-----------------|----------------------|----------------------|
|                                              |                             |                                                |                               | Baseline score          | Follow-up score | p-value <sup>1</sup> | Baseline score     | Follow-up score | p-value <sup>1</sup> | p-value <sup>2</sup> |
| Ridner (2013) [32] <sup>5</sup>              | BCRL, arm                   | CES-D                                          |                               | 12 (9-38)               | 11 (8-22)       | n.r.                 | 12 (7-20)          | 12 (7-23)       | n.r.                 | 0.985 <sup>8</sup>   |
|                                              |                             | POMS                                           |                               | 35 (24-88)              | 31 (24-49)      | n.r.                 | 29 (24-111)        | 29 (24-112)     | n.r.                 | 0.878 <sup>8</sup>   |
| Bongi (2011) [27]                            | SSc, hand                   | SF-36 MSI                                      |                               | 38.2 (6.7)              | 44.4 (6.8)      | <0.001               | 37.2 (6.4)         | 38.8 (6.5)      | >0.05                | 0.01                 |
| dos Santos Crisostomo (2015) [33]            | CVI, leg                    | CIVIQ-20 psychological scale                   |                               | 37.2 (11.1)             | 42.2 (41.4)     | n.r.                 | 39.9 (15.5)        | 48.3 (18.5)     | n.r.                 | >0.05                |
| <b>Social functioning</b>                    |                             |                                                |                               |                         |                 |                      |                    |                 |                      |                      |
| Belmonte (2012) [26]                         | BCRL, arm                   | FACT-B Social well-being subscale <sup>3</sup> |                               | 16.8 (7.3)              | 17.6 (8.7)      | n.r.                 | 19.0 (5.9)         | 19.5 (4.9)      | n.r.                 | 0.440 <sup>7</sup>   |
|                                              |                             | Interference social life <sup>4</sup>          | X                             | 1.8 (2.6)               | 0.1 (0.4)       | 0.003                | 1.5 (3.1)          | 0.7 (1.6)       | 0.3                  | 0.1                  |
| Gradalski (2015) [29]                        | BCRL, arm                   | Interference intimate relations <sup>4</sup>   | X                             | 0.8 (2.2)               | 0.2 (1.0)       | 0.2                  | 0.00 (0.00)        | 0.00 (0.00)     | 1.0                  | 0.04                 |
|                                              |                             | Interference hobbies <sup>4</sup>              | X                             | 2.8 (2.8)               | 0.9 (1.7)       | 0.007                | 1.6 (2.8)          | 1.3 (2.2)       | 0.7                  | 0.1                  |
| dos Santos Crisostomo (2015) [33]            | CVI, leg                    | CIVIQ-20-S                                     |                               | 52.0 (19.8)             | 44.6 (18.2)     | n.r.                 | 47.9 (18.6)        | 49.2 (19.5)     | n.r.                 | >0.05                |
| <b>Pain (in the area affected by oedema)</b> |                             |                                                |                               |                         |                 |                      |                    |                 |                      |                      |
| Belmonte (2012) [26]                         | BCRL, arm                   | VAS <sup>3</sup>                               | X                             | 19.8 (31.1)             | 22.5 (29.1)     | n.r.                 | 16.2               | 8.4 (21.1)      | n.r.                 | 0.182 <sup>7</sup>   |
| Gradalski (2015) [29]                        | BCRL, arm                   | QoL-LQ-S                                       | X                             | 2.4 (2.3)               | 1.1 (1.8)       | 0.04                 | 3.6 (3.0)          | 1.8 (1.9)       | 0.01                 | 0.4                  |
| Bongi (2011) [27]                            | SSc, hand                   | VAS                                            | X                             | 3.8 (2.6)               | 1.5 (2.1)       | <0.001               | 3.6 (2.8)          | 3.8 (2.4)       | >0.05                | <0.01                |
| Holmes (2014) [30]                           | PTS, leg                    | Villalta score <sup>6</sup>                    | X                             | 2.1 (1.1)               | 1.8 (0.8)       | 0.06                 | 2.3 (1.2)          | 1.9 (1.9)       | 0.17                 | 0.852 <sup>7</sup>   |
| dos Santos Crisostomo (2015) [33]            | CVI, leg                    | CIVIQ-20 pain dimension                        | X                             | 55.8 (14.2)             | 47.1 (14.2)     | 0.045                | 55.7 (16.2)        | 55.0 (17.6)     | n.r.                 | 0.035                |
| <b>Vitality/Fatigue</b>                      |                             |                                                |                               |                         |                 |                      |                    |                 |                      |                      |
| Odebiyi (2014) [31]                          | BCRL, arm                   | EFS                                            |                               | 9.1 (5.0)               | 16.7 (3.2)      | <0.001               | 5.7 (1.0)          | 6.8 (1.6)       | 0.02                 | 0.001                |
| Ridner (2013) [32]                           | BCRL, arm                   | BFI                                            |                               | 1.2 (0-8)               | 1.6 (0-6)       | n.r.                 | 1.3 (0-10)         | 1.2 (0-7)       | n.r.                 | 0.748 <sup>8</sup>   |
| dos Santos Crisostomo (2015) [33]            | CVI, leg                    | VAS                                            |                               | 5.2 (2.4)               | 2.2 (2.2)       | 0.001                | 4.7 (2.9)          | 3.9 (2.9)       | n.r.                 | 0.012                |
| <b>General health</b>                        |                             |                                                |                               |                         |                 |                      |                    |                 |                      |                      |
| Ridner (2013) [32]                           | BCRL, arm                   | FACT-G                                         |                               | 91 (32-107)             | 86 (60-105)     | n.r.                 | 88 (32-107)        | 92 (50-105)     | n.r.                 | 0.319 <sup>8</sup>   |

## Notes

<sup>1</sup>p-value for the comparison of the mean scores obtained pre- and post-intervention within each arm of the trial. All studies used a significance level of p=0.05.

<sup>2</sup>p-value for the comparison of the mean scores between the IG and CG. All studies used a significance level of p=0.05.

<sup>3</sup>cross-over trial: data extracted only for the first cycle to avoid carry over and period effects.

<sup>4</sup>QoL-LQ-S: item from the Quality-of-life Lymphoedema Questionnaire.

<sup>5</sup>Data for physical, and role and psychological functioning domains were also assessed but presented in the original publication as effect sizes only, and therefore not extracted.

<sup>6</sup>Post-thrombotic syndrome severity score.

<sup>7</sup>p-value calculated using the information given in the original study using an independent sample t-test.

<sup>8</sup>p-value of the mixed general linear modeling analysis. The two factors included in this analysis were group (LLL, MLD, and MLD and LLL) and time of assessment (baseline, last treatment).

## **Abbreviations**

BCR, Breast Cancer Related;

BFI, Brief Fatigue Inventory;

BG, Between-Group difference;

CG, Control Group;

CES-D, Center for Epidemiologic Studies – Depression scale;

CIVIQ-20, Chronic Venous Insufficiency Quality of Life Questionnaire – 20 items;

CVI, Chronic Venous Insufficiency;

DASH, Disabilities of the Arm, Shoulder and Hand scale;

EORTC QLQ-C30, European Organization for Research and Treatment of Cancer Quality of Life Questionnaire Core 30;

EFS, Energy/Fatigue Scale;

FACT-B, FACT-G, FACT-S, Functional Assessment of Cancer Therapy(-breast)(-general)(-subscale);

HAMIS, Hand Mobility Test in Scleroderma;

HAQ, Health Assessment Questionnaire;

HRQoL, Health-Related Quality of Life;

IG, intervention Group;

LSIDS-A, Lymphoedema Symptom Intensity and Distress Scale - Arm;

MLD, Manual Lymphatic Drainage;

POMS, Profile of Mood States – Short Form;

PP, Pre- vs. Post-intervention mean in the IG;

PTS, Post Thrombotic Syndrome;

QoL-LQ, Quality-of-life Lymphoedema Questionnaire;

SF-36 MSI, PSI, short form-36 mental synthetic index, physical synthetic index;

SSc, Systemic Sclerosis;

-S, -Subscale;

ULL-27, Upper Limb Lymphoedema-27;

VAS, Visual Analog Scale;

VCSS, Venous Clinical Severity Score;  
VEINES-QOL, Venous Insufficiency Epidemiological and Economic Study Quality of Life questionnaire.
